# Supplementary material for: Efficacy and Microbiota Modulation Induced by LimpiAL 2.5%, a New Medical Device for the Inverse Psoriasis Treatment
Source: Int J Mol Sci. 2023 Mar 28;24(7):6339. doi: 10.3390/ijms24076339 (PMC10094358; doi:10.3390/ijms24076339)
Supplement: Supplementary file 1 [file ijms-24-06339-s001.zip › ijms-2280360-supplementary.pdf]

# SUPPLEMENTARY FIGURES AND TABLES.

**Table S1.** LimpiAL 2.5% topical cream formula.

| Ingredients                                                                                                                     | Concentration (%) |
|---------------------------------------------------------------------------------------------------------------------------------|-------------------|
| water                                                                                                                           | 64.05 %           |
| hydrated HAc-40 (85-86% water, 14-15% hyaluronic acid, i.e. HA, conjugated with <1% of bacterial cell wall fragment, i.e. c-40) | 17.85 %           |
| caprylic/capric triglyceride                                                                                                    | 3 %               |
| <i>Chamomilla recutita</i> flower oil extract                                                                                   | 3 %               |
| <i>Helichrysum italicum</i> glyceric extract                                                                                    | 3 %               |
| Sepilife™ nude                                                                                                                  | 2.75 %            |
| Fluidifeel™ easy                                                                                                                | 2 %               |
| ammonium lactate                                                                                                                | 1 %               |
| glycerin                                                                                                                        | 1 %               |
| glyceryl caprylate                                                                                                              | 0.80 %            |
| butyrospermum parkii butter                                                                                                     | 0.50 %            |
| decylene glycol                                                                                                                 | 0.40 %            |
| tocopheryl acetate                                                                                                              | 0.30 %            |
| sodium hydroxide                                                                                                                | 0.25 %            |
| zinc gluconate                                                                                                                  | 0.10 %            |

**Table S2.** Statistical comparison between the sequencing outputs of NGS Illumina MiSeq. In the first column are reported the statistical significance values (p-values) obtained comparing the reads number of the indicated comparisons. In the second column are reported the statistical significance values (p-values) regarding the number of OTUs and calculated through the ANOVA test.

| Comparison | Reads                                       | OTUs                      |
|------------|---------------------------------------------|---------------------------|
|            | <i>Kolmogorov-Smirnov test</i><br>(p-value) | <i>ANOVA</i><br>(p-value) |
| T0 vs CTRL | 0.36                                        | 0.32                      |
| T1 vs CTRL | 0.74                                        | 0.34                      |
| T1 vs T0   | 0.40                                        | 0.90                      |

**Table S3.** Statistical comparison of the alpha diversity indexes between the indicated comparisons and taxonomic levels. The blue values indicate the comparison was performed through the Kolmogorov-Smirnov test ( $p \leq 0.05$ ). The black ones were calculated using the Whelch's t-test ( $p \leq 0.05$ ).

| Taxon   | OTUs number |           |           | Chao1     |           |           | Shannon   |           |           |
|---------|-------------|-----------|-----------|-----------|-----------|-----------|-----------|-----------|-----------|
|         | T0          | T1        | T1        | T0        | T1        | T1        | T0        | T1        | T1        |
|         | <i>vs</i>   | <i>vs</i> | <i>vs</i> | <i>vs</i> | <i>vs</i> | <i>vs</i> | <i>vs</i> | <i>vs</i> | <i>vs</i> |
|         | CTRL        | CTRL      | T0        | CTRL      | CTRL      | T0        | CTRL      | CTRL      | T0        |
| Phylum  | 0.097       | 0.147     | 0.345     | 0.945     | 0.100     | 0.099     | 0.452     | 0.426     | 0.603     |
| Class   | 0.107       | 0.330     | 0.512     | 0.646     | 0.816     | 0.400     | 0.358     | 0.361     | 0.250     |
| Order   | 0.086       | 0.368     | 0.726     | 0.591     | 0.982     | 0.811     | 0.358     | 0.127     | 0.537     |
| Family  | 0.132       | 0.346     | 0.863     | 0.137     | 0.063     | 0.759     | 0.358     | 0.127     | 0.250     |
| Genus   | 0.081       | 0.279     | 0.795     | 0.054     | 0.352     | 0.889     | 0.591     | 0.444     | 0.933     |
| Species | 0.089       | 0.324     | 0.785     | 0.093     | 0.314     | 0.715     | 0.078     | 0.244     | 0.533     |

**Table S4.** Taxa differentially modulated in the indicated compared microbiotas (DESeq2, p-value and FDR  $\leq 0.05$ )

| Comparison       | Modulated taxon | OTUs ID                                              | logFC   | p-value  | FDR    | logFC.std |
|------------------|-----------------|------------------------------------------------------|---------|----------|--------|-----------|
| T0 <i>vs</i> CTR | Class           | <i>Bacteroidetes;Cytophagia</i>                      | -3.0623 | 0.0002   | 0.0255 | -3.4926   |
| T1 <i>vs</i> CTR | Phylum          | <i>Firmicutes</i>                                    | 2.6131  | 0.0013   | 0.0465 | -1.2585   |
|                  | Class           | <i>Firmicutes;Bacilli</i>                            | 2.6078  | 0.0004   | 0.0377 | 2.1609    |
|                  | Order           | <i>Firmicutes;Bacilli;Bacillales</i>                 | 3.7885  | 4.34E-05 | 0.0054 | 2.6236    |
|                  | Order           | <i>Tenericutes;Mollicutes;Mycoplasmatales</i>        | 5.8157  | 9.03E-05 | 0.0075 | 4.8276    |
|                  | Order           | <i>Actinobacteria;Actinobacteria;Actinomycetales</i> | 3.5652  | 0.0003   | 0.0208 | 3.2728    |

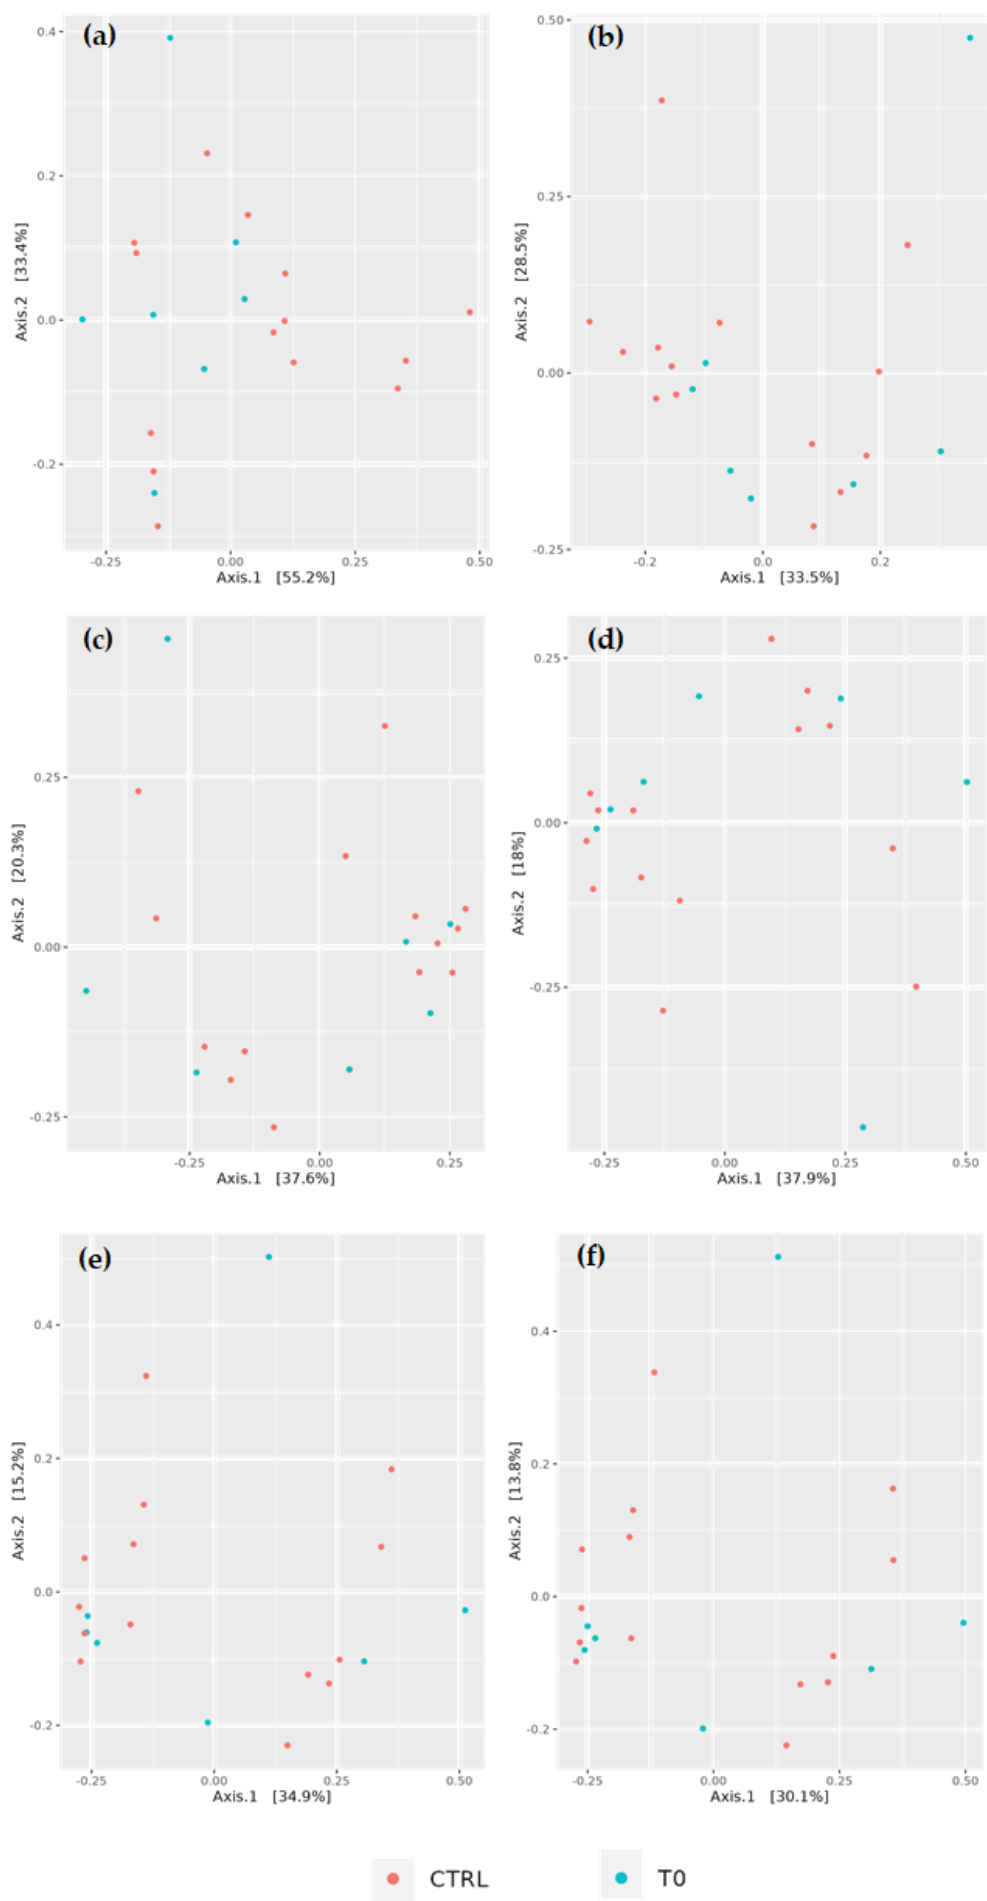

**Figure S1.** PCoA of Bray-Curtis distances between the T0 and CTRL samples at phylum (a), class (b), order (c), family (d), genus (e) and species (f) level.

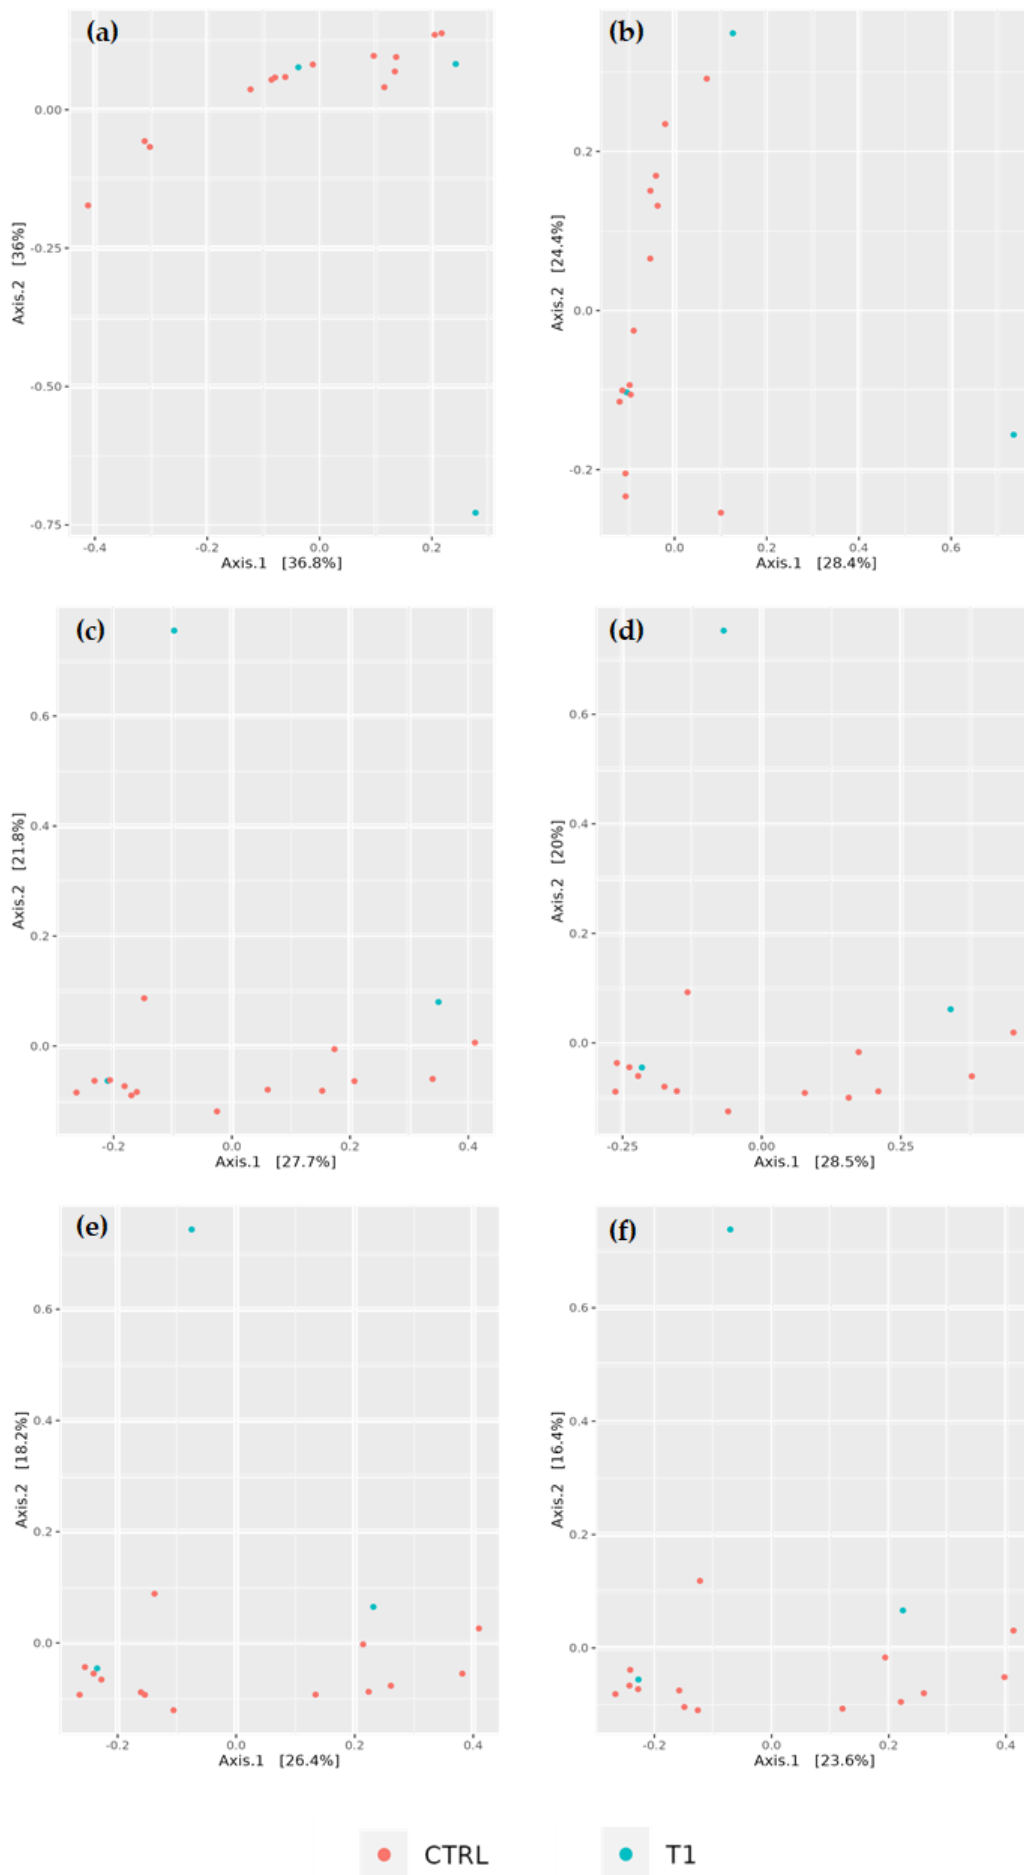

**Figure S2.** PCoA of Bray-Curtis distances between the T1 and CTRL samples at phylum (a), class (b), order (c), family (d), genus (e) and species (f) level.

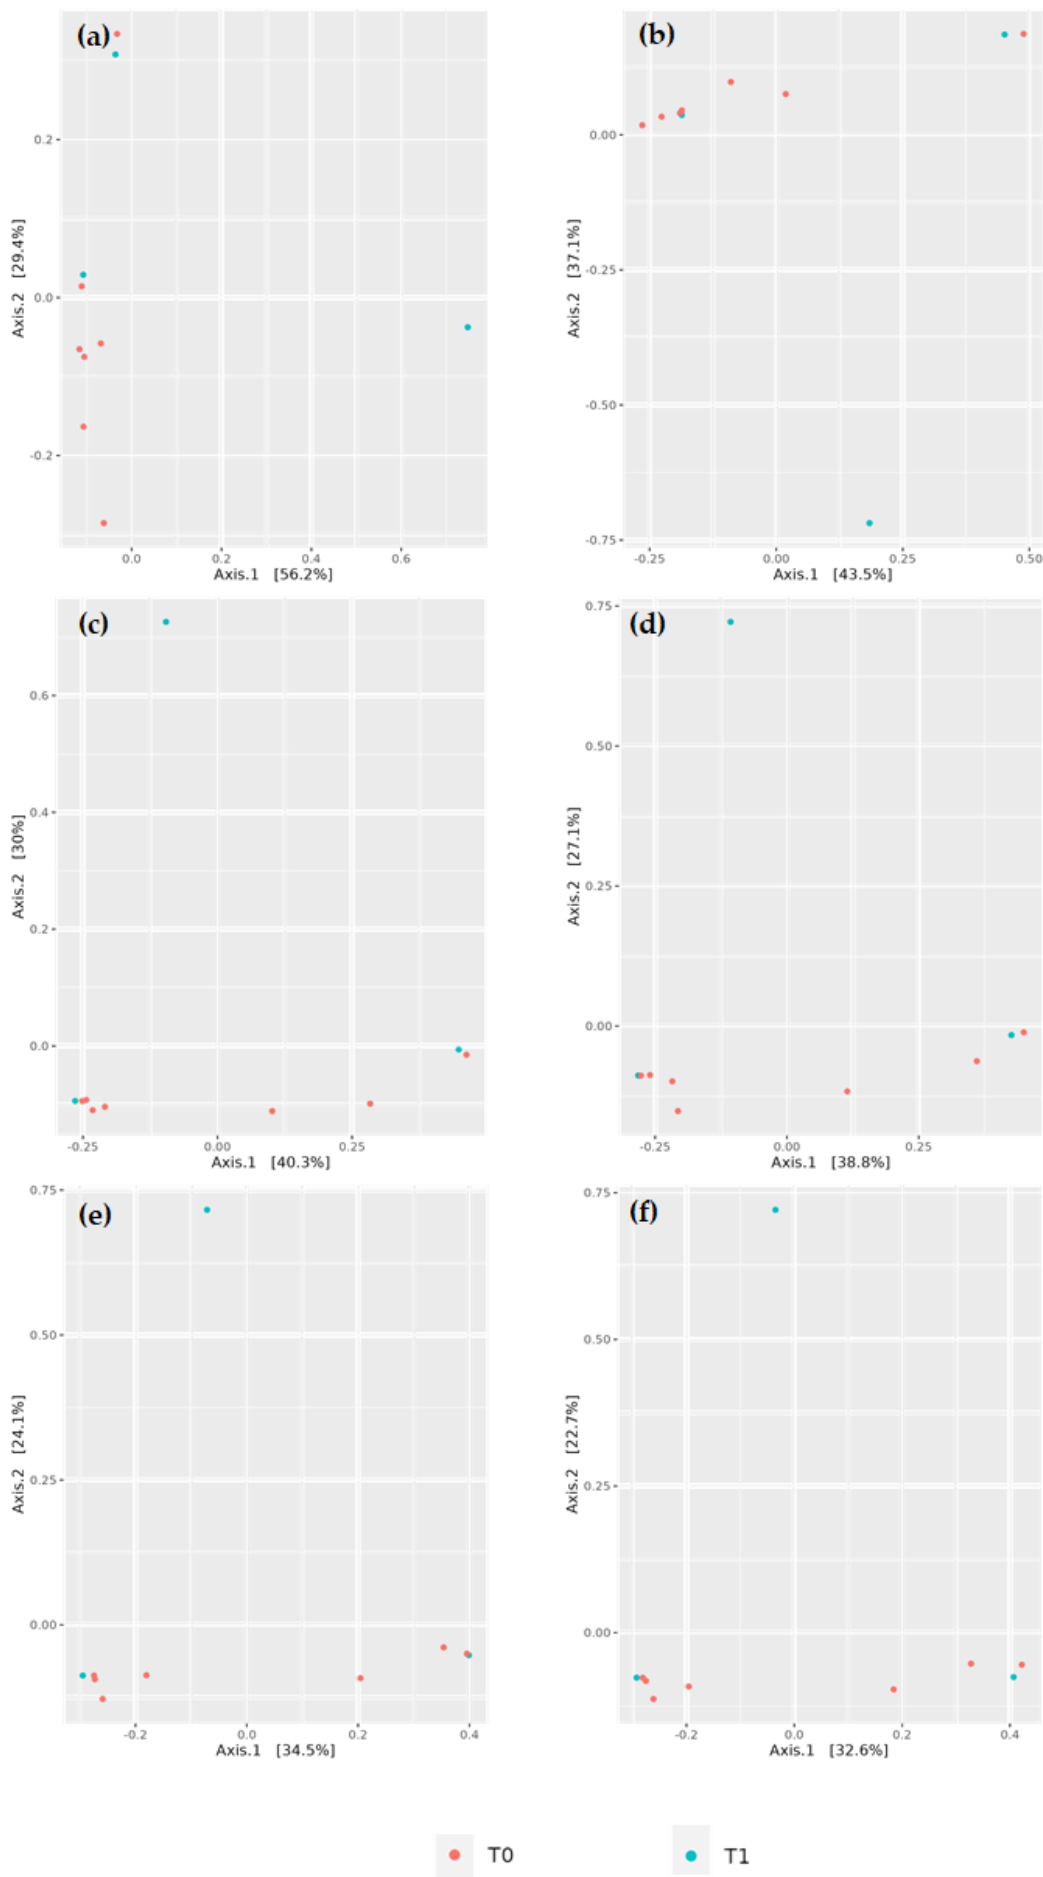

**Figure S3.** PCoA of Bray-Curtis distances between the T1 and T0 samples at phylum (a), class (b), order (c), family (d), genus (e) and species (f) level.

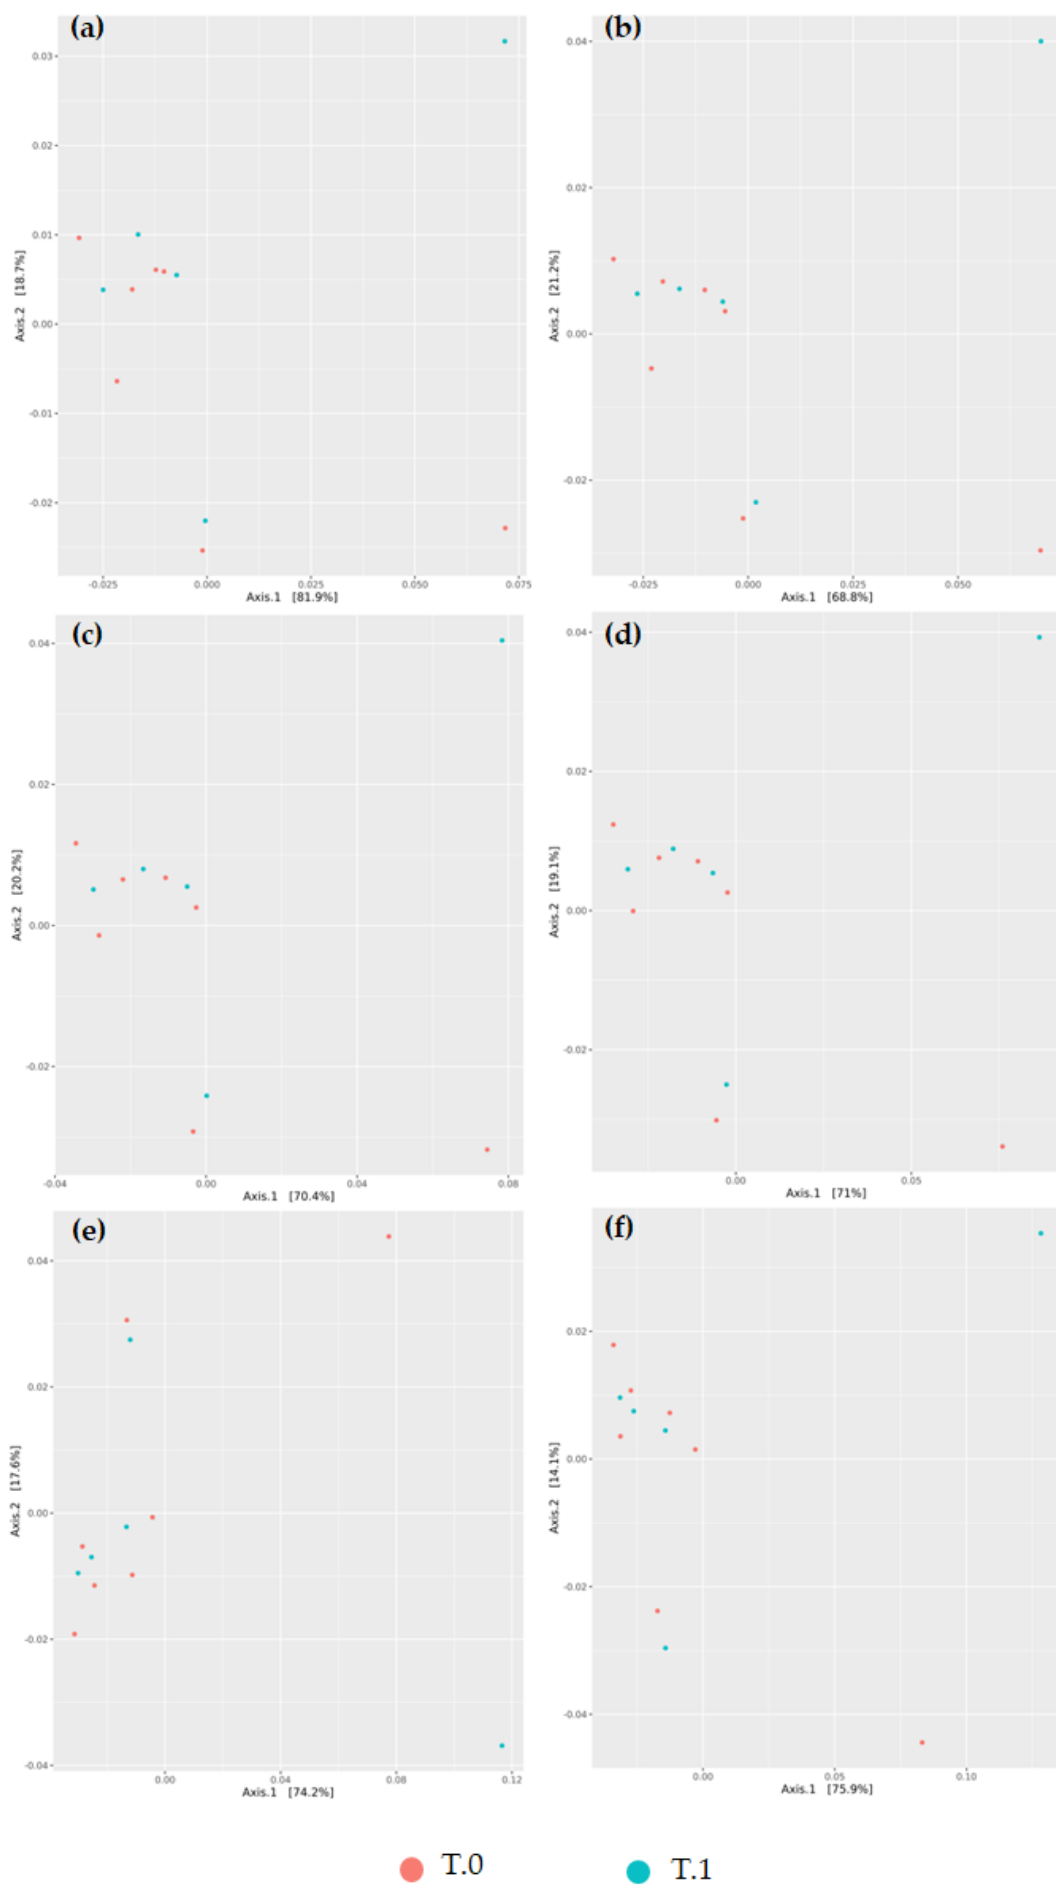

**Figure S4.** PCoA of Bray-Curtis distances between the T.1 and T.0 samples at phylum (a), class (b), order (c), family (d), genus (e) and species (f) level.
